# Supplementary material for: Circulating PD‐1 (+) cells may participate in immune evasion in peripheral T‐cell lymphoma and chidamide enhance antitumor activity of PD‐1 (+) cells
Source: PubMed Central journal article supplement (PMC6536954; doi:10.1002/cam4.2097), 2019-04-10

# Pearson correlation between samples

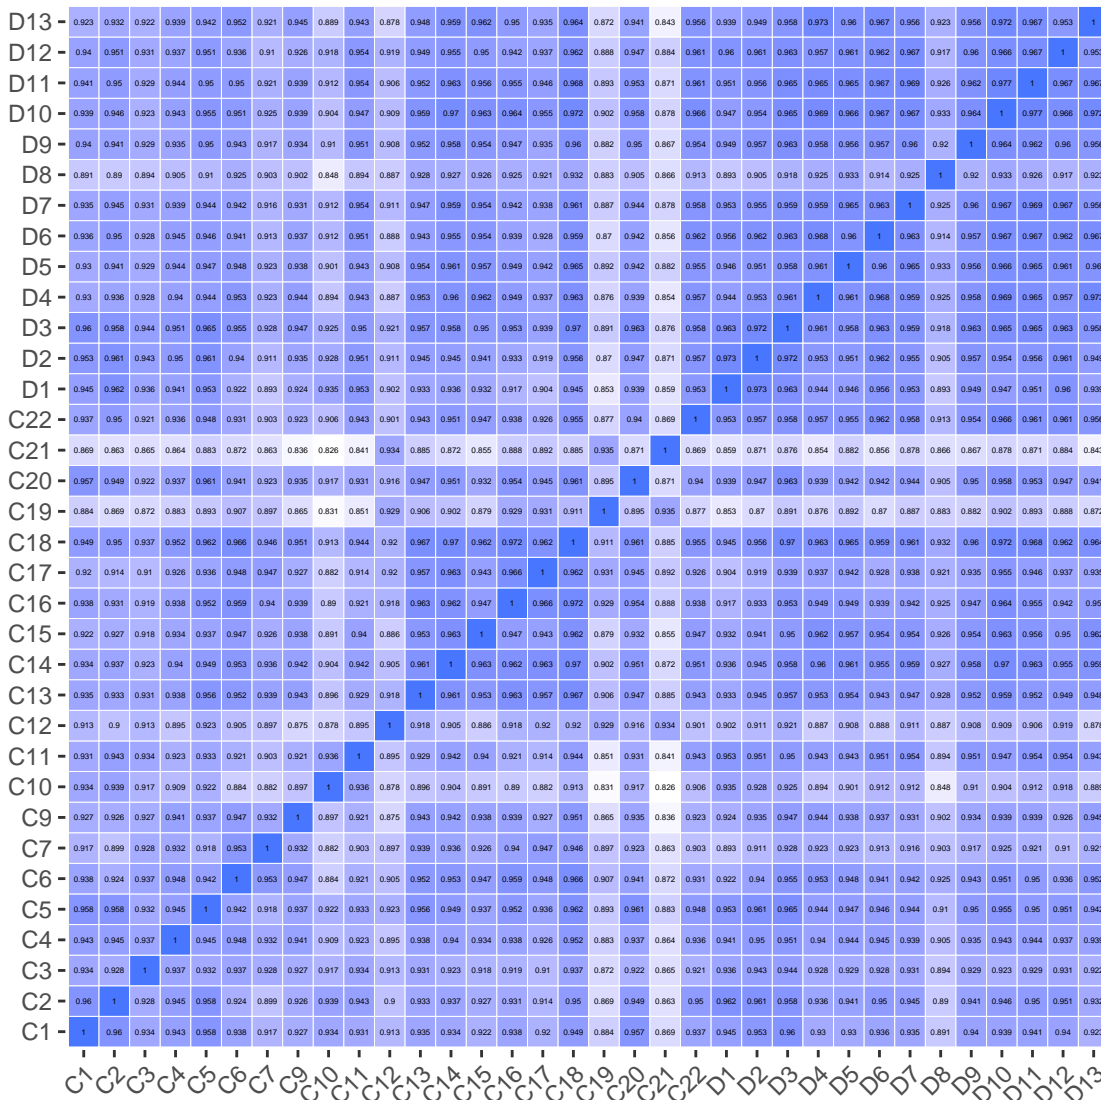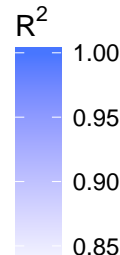

Supplement: CAM4-8-2104-s001.pdf [file CAM4-8-2104-s001.pdf]
